# Supplementary material
Source: Springer Nature journal article supplement (https://www.springermedizin.de/resource/supplementary/13048_2009_16_MOESM1_ESM.pdf/9664758)
Supplement: MOESM1 [file 9664758]

Increased FDG uptake  
In the ovary

```
graph TD; A[Increased FDG uptake In the ovary] --> B[Premenopausal patient without known gynecologic malignant mean SUV=5.7 ± 1.5 (range 3.8-8.2)]; A --> C[Ovarian cancer mean SUV=9.1 ± 4 (range 4.5-15.6)]; B --> D[Around ovulatory phase between the 10th and 25th days of the menstrual cycle]; B --> E[Oligomenorrhea]; B --> F[Endometrial cyst];
```

Premenopausal patient  
without known  
gynecologic malignant  
mean SUV=5.7 ± 1.5  
(range 3.8-8.2)

Ovarian cancer  
mean SUV=9.1 ± 4  
(range 4.5-15.6)

Around ovulatory  
phase  
between the 10th and  
25th days of the  
menstrual cycle

Oligomenorrhea

Endometrial cyst
